# Supplementary material for: Differential Gene Expression Segregates Cattle Confirmed Positive for Bovine Tuberculosis from Antemortem Tuberculosis Test-False Positive Cattle Originating from Herds Free of Bovine Tuberculosis
Source: Vet Med Int. 2012 Jun 4;2012:192926. doi: 10.1155/2012/192926 (PMC3373196; doi:10.1155/2012/192926)
Supplement: Supplementary file 1 — Supplementary Table S1: Genes from microarray analysis that showed statistically significant (p ≤ 0.01) differential expression in one or more of the single test-false positive (SFP), double test-false positive (DFP) and bTB infected (bTB) groups of cattle after a 4 hour stimulation of whole blood with tuberculin.Differential expression is shown here as log fold change. Supplementary Table S2: Genes from microarray analysis that showed statistically significant (p ≤ 0.01) differential power between the single test-false positive (SFP), double test-false positive (DFP) and bTB infected (bTB) groups of cattle after a 4 hour stimulation of whole blood with tuberculin. Differential expression in log fold change was computed between the bTB and the DFP groups (bTB versus DFP), the bTB and the SFP groups (bTB versus SFP), and the DFP and the SFP groups (DFP versus SFP). [file 192926.f1.xls]

## Sheet: Add file 1
Gene_ID	SFP	p value (SFP)	DFP	p value (DFP)	bTB	p value (bTB)	Gene symbol	Gene Description
BOTL0100001XA06R	0.179755	0.220845	0.592024	0.00579431	0.412207	0.0419088	EIF4B	eukaryotic translation initiation factor 4B
BOTL0100001XA07R	0.33527	0.0163656	0.48335	0.00992998	0.526949	0.00570063	OTUD5	OTU domain containing 5
BOTL0100001XE12R	0.71253	4.23e-05	0.219776	0.216182	0.0359178	0.836096	IGFBP2	insulin-like growth factor binding protein 2, 36kDa
BOTL0100001XG12R	0.179436	0.149924	0.595909	0.00153079	0.0500291	0.754253	MRPL41	similar to Mitochondrial ribosomal protein L41
BOTL0100002XA12R	0.120305	0.290562	0.489047	0.00388895	0.110431	0.45933	HNRPDL	similar to heterogeneous nuclear ribonucleoprotein D-like
BOTL0100002XB09R	-0.289654	0.0194209	-0.683328	0.000265084	0.0211166	0.888241	BOLA-DRA	major histocompatibility complex, class II, DR alpha
BOTL0100002XC05R	-0.0922968	0.480301	-0.621947	0.00194805	0.208943	0.233839	DDX5	DEAD (Asp-Glu-Ala-Asp) box polypeptide 5
BOTL0100002XE10R	0.618278	0.00229731	0.65075	0.0109693	0.589371	0.019201	RPLP1	ribosomal protein, large, P1
BOTL0100002XF06R	0.452424	0.00302535	0.298854	0.101551	0.308248	0.0920636	Unknown	unknown
BOTL0100002XH05R	0.0719523	0.403672	0.164767	0.156766	-0.327111	0.00927553	Unknown	unknown
BOTL0100002XH07R	0.492029	0.00307031	0.0594104	0.755692	0.244441	0.21093	RPS3A	Ribosomal protein S3Ae
BOTL0100003XA05R	0.481229	0.000183362	0.480338	0.00221735	0.168899	0.220942	CCDC61	coiled-coil domain containing 61
BOTL0100003XA07R	0.395432	0.00315954	0.152907	0.327447	0.264852	0.0990506	Unknown	unknown
BOTL0100003XD08R	0.223661	0.0444757	-0.071159	0.607799	0.505783	0.00178802	Unknown	unknown
BOTL0100003XD09R	0.176271	0.123588	0.0197221	0.892487	0.502593	0.00286842	VWA5B1	von Willebrand factor A domain containing 5B1
BOTL0100003XE07R	0.550786	0.000637703	0.702594	0.00087756	0.487867	0.012229	MARS	similar to methionine-tRNA synthetase
BOTL0100003XE11R	0.213069	0.0680237	0.448849	0.0065556	0.397202	0.013895	PTPRCAP	protein tyrosine phosphatase, receptor type, C-associated protein
BOTL0100003XF04R	0.392972	0.00189497	-0.0231413	0.871467	0.0507184	0.723295	Unknown	unknown
BOTL0100003XF12R	0.317898	0.019998	0.552303	0.00367174	0.390975	0.0288546	ATP6V1A	ATPase, H+ transporting, lysosomal 70kDa, V1 subunit A
BOTL0100003XG01R	0.51595	0.00422431	0.702824	0.00342269	0.352404	0.105567	unknown	unknown
BOTL0100003XG06R	0.121991	0.563023	1.194	0.000449499	0.0570051	0.837392	TRRA1	Bos taurus transmembrane protein, adipocyte asscociated 1 (TPRA1)
BOTL0100003XH02R	0.411052	0.03543	1.14577	0.00017137	0.422615	0.0933922	CCDC83	coiled-coil domain containing 83
BOTL0100003XH04R	0.53451	0.0055348	-0.0680127	0.762826	-0.275273	0.2317	MRPL41	similar to Mitochondrial ribosomal protein L41
BOTL0100003XH07R	-0.00340951	0.971894	0.369097	0.00963877	-0.0801175	0.533884	RNF149	ring finger protein 149
BOTL0100004XC04R	3.88e-06	0.999969	0.401598	0.00697364	-0.0466558	0.724949	IMP4	similar to U3 snoRNP protein 4 homolog
BOTL0100004XC08R	0.357647	0.00262919	0.351328	0.0179678	0.184461	0.186135	PTPN6	similar to protein tyrosine phosphatase, non-receptor type 2
BOTL0100004XD09R	-0.0203714	0.880486	-0.0755111	0.674279	0.623085	0.00267449	Unknown	unknown
BOTL0100004XE05R	0.498239	0.00456229	-0.130559	0.524752	-0.102102	0.618049	Unknown	unknown
BOTL0100004XF12R	0.0743023	0.603804	-0.585966	0.00597087	0.169473	0.374807	LSP1	lymphocyte-specific protein 1
BOTL0100004XH06R	-0.312246	0.00839527	0.228724	0.11638	0.303664	0.0423728	TRIM13	tripartite motif-containing 13
BOTL0100005XC11R	0.237594	0.0715021	0.599295	0.0019725	0.167112	0.320551	ZDHHC14	zinc finger, DHHC-type containing 14
BOTL0100006XA06R	0.151699	0.235922	0.517692	0.00573099	0.43439	0.0167171	CD300E	CD300e molecule
BOTL0100006XA11R	0.0542	0.55066	0.379711	0.00511883	-0.00687808	0.954096	ABLIM1	similar to actin-binding LIM protein 1
BOTL0100006XC10R	0.202681	0.179628	0.557775	0.00988059	0.213553	0.280331	PARP10	similar to Poly [ADP-ribose] polymerase 10 (PARP-10)
BOTL0100006XC11R	0.0391812	0.835294	0.765286	0.00643431	0.0808702	0.745871	PTPRCAP	protein tyrosine phosphatase, receptor type, C-associated protein
BOTL0100006XH11R	0.0867621	0.712192	1.38096	0.000328502	0.129007	0.678563	Unknown	unknown
BOTL0100008_A07	0.280841	0.00186057	0.204953	0.0575809	0.115494	0.26645	H1FX	similar to histone H1x
BOTL0100008_B03	0.755398	0.00139505	0.386923	0.156476	0.185986	0.485386	LACTB	similar to lactamase, beta
BOTL0100008_B11	0.231798	0.0783577	0.707589	0.000485111	0.128857	0.441473	FOXO3	similar to forkhead protein
BOTL0100008_C06	0.337869	0.00292678	0.230259	0.0906649	-0.000261744	0.998395	DRAP1	similar to Dr1 associated protein 1 (negative cofactor 2 alpha
BOTL0100008_C07	0.493643	0.000884875	0.481675	0.00852259	-0.166915	0.315767	NOTCH2	Notch homolog 2 (Drosophila)
BOTL0100008_D10	0.471051	0.00194172	0.14672	0.398644	0.612078	0.00223318	PABPC1	poly(A) binding protein, cytoplasmic 1
BOTL0100008_E04	0.517666	0.00646993	-0.166913	0.458258	0.198891	0.378479	Unknown	unknown
BOTL0100008_F07	0.295103	0.00778568	-0.171432	0.201634	0.129054	0.33119	NAV3	neuron navigator 3
BOTL0100008_H01	0.262953	0.00767291	0.16663	0.164698	0.080372	0.492851	TRIP12	similar to thyroid hormone receptor interactor 12
BOTL0100008_H04	0.36744	0.113187	0.882916	0.00761752	0.410825	0.175957	SVEP1	sushi, von Willebrand factor type A, EGF and pentraxin domain containing 1
BOTL0100008_H06	0.531395	0.0206086	0.964146	0.00278261	0.756032	0.0138415	BRI3	similar to Brain protein I3 (pRGR2)
BOTL0100009_A07	0.388891	0.00482873	0.072296	0.653442	0.129486	0.424468	WDFY4	WDFY family member 4
BOTL0100009_A11	0.323909	0.00357687	0.0195628	0.878716	0.181144	0.169976	AOC3	amine oxidase, copper containing 3 (vascular adhesion protein 1)
BOTL0100009_E08	0.0116974	0.921579	-0.525557	0.00357347	-0.0256724	0.870297	DSCAM	Down syndrome cell adhesion molecule
BOTL0100009_H08	0.0995906	0.575064	-0.684787	0.00875664	-0.0666928	0.775777	BIRC3	baculoviral IAP repeat-containing 2
BOTL0100010_A04	0.280841	0.175979	-0.810247	0.00692951	0.0369761	0.889787	AKD2	adenylate kinase domain containing 2
BOTL0100010_A11	-0.00445422	0.977784	-0.188363	0.379116	-0.714036	0.0033442	MAP2K7	similar to MAP kinase kinase 7 gamma 1
BOTL0100010_B02	0.121734	0.280758	-0.549199	0.00149225	0.273686	0.0757366	BOLA-DMA	major histocompatibility complex, class II, DM alpha-chain
BOTL0100010_B10	0.073707	0.544022	-0.548968	0.00292882	-0.0896361	0.576661	HERC1	hect (homologous to the E6-AP (UBE3A) carboxyl terminus) domain and RCC1 (CHC1)-like domain (RLD) 1
BOTL0100010_C12	0.335643	0.00972845	0.0591521	0.701971	0.271039	0.0928165	GIMAP1	similar to human immunity associated protein 1
BOTL0100010_F10	0.202075	0.176009	-0.605874	0.00536348	-0.23037	0.240205	POLR2G	polymerase (RNA) II (DNA directed) polypeptide G
BOTL0100010_G07	-0.0024079	0.985356	-0.519718	0.00759528	0.450765	0.0176258	ARF3	ADP-ribosylation factor 3
BOTL0100010_H10	0.284195	0.0196733	-0.533354	0.00200588	0.155811	0.299741	TMX4	Bos taurus thioredoxin-related transmembrane protein 4 (TMX4)
BOTL0100011_A05	0.0754516	0.520575	0.0641127	0.678709	-0.5868	0.0013234	Unknown	unknown
BOTL0100011_D03	-0.194746	0.0727751	-0.408708	0.00758718	-0.214731	0.129117	PPP2R1A	similar to alpha isoform of regulatory subunit A, protein phosphotase 2
BOTL0100011_E09	0.387273	0.00931934	-0.147545	0.408763	0.0930054	0.600244	Unknown	unknown
BOTL0100011_G02	-0.207313	0.163355	-0.356503	0.0755492	-0.647074	0.00322902	POMT1	protein-O-mannosyltransferase 1
BOTL0100011_H08	-0.381518	0.0298615	-0.00449243	0.983372	-0.62489	0.00931843	LAMA2	laminin, alpha 2
BOTL0100013_B08	0.304964	0.101488	0.68813	0.00902454	0.490179	0.0507211	Unknown	unknown
BOTL0100013_B09	-0.132864	0.387049	-0.602027	0.00754815	-0.47582	0.0282265	INPP5D	inositol polyphosphate-5-phosphatase, 145kDa
BOTL0100013_C02	0.282464	0.00612358	-0.132135	0.282465	-0.222403	0.0793328	KIAA0240	KIAA0240
BOTL0100013_H01	0.292586	0.0036237	0.265961	0.0329168	0.234773	0.0560527	SLC6A1	solute carrier family 6 (neurotransmitter transporter, GABA), member 1
BOTL0100013_H04	-0.328701	0.00438793	-0.111361	0.410291	-0.170985	0.212435	LOC100140226	Bos taurus zinc finger protein 701-like (LOC100140226)
BOTL0400001_PCR	0.236683	0.206656	0.999346	0.000646103	0.556203	0.0324717	MPL	similar to c-myeloproliferative leukemia virus type P
BOTL0400032_PCR	0.0897209	0.568748	0.693746	0.00354306	0.45951	0.0383306	MAPK10	mitogen-activated protein kinase 10
BOTL0400035_PCR	-0.0388877	0.777955	0.259078	0.167599	0.881078	0.000144829	PPP2R5B	similar to beta isoform of regulatory subunit B56, protein p...
BOTL0400073_PCR	-0.016319	0.902803	0.511778	0.00938545	0.105312	0.553432	CSF1	colony stimulating factor 1 (macrophage)
BOTL0400084_PCR	0.587019	0.00368187	0.136676	0.559868	0.566006	0.0250632	WEE1	similar to WEE1Hu CDK tyrosine 15-kinase
BOTL0400105_PCR	0.0761428	0.591138	0.565169	0.00707613	-0.127546	0.497522	CXCR5	Burkitt lymphoma receptor 1, GTP binding protein (chemokine (C-X-C motif) receptor 5)
BOTL0400120_PCR	0.111845	0.513063	0.0383626	0.8645	-0.762752	0.00320291	PTGS2	prostaglandin-endoperoxide synthase 2 (prostaglandin G/H synthase and cyclooxygenase)
BOTL0400127_PCR	-0.199075	0.309214	0.244678	0.343732	-0.743109	0.00898562	TCEB3	transcription elongation factor B (SIII), polypeptide 3 (110kDa, elongin A)
BOTL0400140_PCR	-0.344876	0.00789648	0.363209	0.028199	-0.00755701	0.960679	CCR5	chemokine (C-C motif) receptor 5
BOTL0400164_PCR	0.475327	0.00206988	0.248846	0.167311	0.0927952	0.597289	CXCR4	chemokine (C-X-C motif) receptor 4
BOTL0400174_PCR	-0.292064	0.113443	-0.148155	0.530287	-0.828067	0.00239055	CTLA4	cytotoxic T-lymphocyte-associated protein 4
BOTL0400176_PCR	0.0312433	0.841897	0.714378	0.00284067	-0.0850952	0.68191	CCND2	similar to G1/S-specific cyclin D2
BOTL0400207_PCR	-0.401225	0.00365813	-0.0731026	0.647248	0.0347425	0.827413	EPHB1	EPH receptor B1
BOTL0400216_PCR	0.329156	0.00482563	0.069245	0.611676	-0.230606	0.10352	EFNB1	ephrin-B1
BOTL0400249_PCR	-0.600103	0.000623666	0.431608	0.0355047	-0.278096	0.158889	GCGR	similar to glucagon receptor
BOTL0400255_PCR	0.0775494	0.715937	-0.896154	0.00503839	-0.355395	0.217409	CXCL2	chemokine (C-X-C motif) ligand 2
BOTL0400279_PCR	-0.450031	0.00259258	-0.0406463	0.81173	0.0882165	0.606353	IL4	interleukin 4
BOTL0400281_PCR	-0.422414	0.00973619	0.123836	0.526126	-0.310539	0.123329	IL5	interleukin 5
BOTL0400325_PCR	0.123887	0.456712	-0.655774	0.00744572	0.0617402	0.777584	LHCGR	luteinizing hormone/choriogonadotropin receptor
BOTL0400328_PCR	-0.514835	0.00216936	-0.191889	0.321405	0.212747	0.273251	BCAM	Lutheran blood group (Auberger b antigen included)
BOTL0400331_PCR	0.0801461	0.622719	0.205785	0.344529	0.650208	0.00706084	LTBR	lymphotoxin beta receptor (TNFR superfamily, member 3)
BOTL0400350_PCR	0.0625461	0.753317	1.00045	0.00131085	0.189198	0.475215	MAP3K1	similar to MEK kinase 1
BOTL0400357_PCR	0.703625	0.00751163	0.377312	0.234301	-0.27195	0.386358	MMP13	matrix metallopeptidase 13 (collagenase 3)
BOTL0400371_PCR	0.22966	0.201083	1.03463	0.000315582	0.116363	0.616768	PSMD7	proteasome (prosome, macropain) 26S subunit, non-ATPase, 7
BOTL0400397_PCR	-0.435896	0.00840868	0.124687	0.526535	0.126993	0.519012	IL11RA	interleukin 11 receptor, alpha
BOTL0400405_PCR	0.397075	0.0183377	0.806483	0.000941015	0.497722	0.0242634	PDGFB	platelet-derived growth factor B
BOTL0400407_PCR	0.260688	0.148893	1.55027	3.61e-06	0.395082	0.101432	RPL19	similar to ribosomal protein L19
BOTL0400421_PCR	-0.0139356	0.932861	-0.763241	0.00261273	-0.331385	0.14311	CD14	CD14 molecule
BOTL0400426_PCR	-0.324431	0.00736361	0.409646	0.00986962	-0.125712	0.383744	CASP8AP2	caspase 8 associated protein 2
BOTL0400429_PCR	0.175278	0.0627988	0.489708	0.000621062	0.17312	0.155152	RPL18A	ribosomal protein L18a
BOTL0400432_PCR	-0.327428	0.00731326	-0.0886121	0.540101	-0.18547	0.208314	SMARCAL1	SWI/SNF related, matrix associated, actin dependent regulator
BOTL0400433_PCR	-0.279475	0.00619698	0.0718322	0.550562	-0.119934	0.323625	CSNK1G1	casein kinase 1, gamma 1
BOTL0400443_PCR	0.178485	0.0746366	-0.0207201	0.869388	-0.381184	0.0070963	CUL1	cullin 1
BOTL0400456_PCR	-0.412309	0.00205737	0.102577	0.501609	0.0729124	0.631731	Unknown	unknown
BOTL0400464_PCR	-0.479738	0.00687376	-0.091126	0.663278	-0.120788	0.564726	F5	coagulation factor V (proaccelerin, labile factor)
BOTL0400480_PCR	0.490549	0.00588494	0.672587	0.00460615	0.536089	0.018585	unknown	unknown
BOTL0400482_PCR	-0.403612	0.000920562	-0.134396	0.325122	-0.0535596	0.691259	CXCL10	chemokine (C-X-C motif) ligand 10
BOTL0400484_PCR	-0.423096	0.00575422	-0.0315279	0.860391	-0.198257	0.277371	CCNB2	cyclin B2
BOTL0400487_PCR	0.343759	0.0826137	1.06341	0.000494726	0.165007	0.511759	MAPK13	mitogen-activated protein kinase 13
BOTL0400491_PCR	0.0533374	0.684443	0.554157	0.00488039	-0.282751	0.116289	GPR98	similar to G protein-coupled receptor 98
BOTL0400499_PCR	0.653565	0.0088959	0.365238	0.227791	0.345028	0.253438	HINT1	histidine triad nucleotide binding protein 1
BOTL0400502_PCR	0.168735	0.234045	0.492388	0.0147021	0.546983	0.00781264	Unknown	unknown
BOTL0400508_PCR	0.167331	0.213132	0.439311	0.0202084	0.504083	0.00920336	H3F3B	H3 histone, family 3B (H3.3B)
BOTL0400511_PCR	-0.122864	0.518942	0.43189	0.0984792	0.894603	0.00217288	PRKCI	protein kinase C, iota
BOTL0400518_PCR	-0.166873	0.27901	-0.591007	0.00832422	-0.269384	0.190284	NRP1	similar to neuropilin-1
BOTL0400536_PCR	0.24535	0.18677	0.730925	0.00666448	0.117106	0.625734	ODF3B	similar to sperm tail protein SHIPPO1
BOTL0400542_PCR	0.51149	0.0214515	0.824185	0.00676483	0.645142	0.0272555	PDGFA	similar to Platelet-derived growth factor A chain precursor
BOTL0400586_PCR	-0.364224	0.00947031	-0.174181	0.303878	-0.0431565	0.795849	MSR1	macrophage scavenger receptor 1
BOTL0400592_PCR	-0.134003	0.401508	0.67168	0.00473704	-0.090791	0.664905	GZMH	similar to Granzyme H precursor (Cytotoxic T-lymphocyte protein
BOTL0400606_PCR	0.712105	0.00114004	1.15865	0.000169667	0.456083	0.0747564	MCHR1	melanin-concentrating hormone receptor 1
BOTL0400607_PCR	0.186245	0.352543	-0.894489	0.00302319	-0.336698	0.209023	SPARC	secreted protein, acidic, cysteine-rich
BOTL0400624_PCR	0.368864	0.00731201	-0.195338	0.238046	-0.0949786	0.559728	TIMP1	TIMP metallopeptidase inhibitor 1
BOTL0400637_PCR	-0.263478	0.130872	-0.150071	0.503156	-0.691935	0.0059444	PLAT	plasminogen activator, tissue
