# Supplementary material for: Differential Gene Expression Segregates Cattle Confirmed Positive for Bovine Tuberculosis from Antemortem Tuberculosis Test-False Positive Cattle Originating from Herds Free of Bovine Tuberculosis
Source: Vet Med Int. 2012 Jun 4;2012:192926. doi: 10.1155/2012/192926 (PMC3373196; doi:10.1155/2012/192926)
Supplement: Supplementary file 2 [file 192926.f2.xls]

## Sheet: Sheet1
Gene_ID	bTB vs.DFP	p value (bTB-SFP)	bTB vs.SFP	p value (bTB-DFP)	DFP vs. SFP	p value (DFP-SFP)	Gene Symbol	Gene Description
BOTL0100001XE12R	-0.183859	0.457525	-0.676613	0.00591386	-0.492754	0.0348061	IGFBP2	insulin-like growth factor binding protein 2, 36kDa
BOTL0100002XB09R	0.704445	0.00379753	0.31077	0.112702	-0.393674	0.0492774	BOLA-DRA	major histocompatibility complex, class II, DR alpha
BOTL0100002XC05R	0.83089	0.0030116	0.30124	0.17386	-0.52965	0.0233613	DDX5	DEAD (Asp-Glu-Ala-Asp) box polypeptide 5
BOTL0100002XG05R	0.55692	0.01808	-0.0773177	0.686308	-0.634238	0.00375342	H3F3B	H3 histone, family 3B (H3.3B)
BOTL0100002XH05R	-0.491878	0.0062573	-0.399063	0.010946	0.0928151	0.514172	Unknown	unknown
BOTL0100003XD08R	0.576942	0.00827974	0.282122	0.116904	-0.29482	0.102463	Unknown	unknown
BOTL0100003XG06R	-1.13699	0.00937289	-0.064986	0.851927	1.07201	0.00631236	TRRA1	transmembrane protein, adipocyte asscociated 1 (TPRA1)
BOTL0100003XH04R	-0.20726	0.517665	-0.809783	0.00990917	-0.602523	0.0451001	MRPL41	similar to Mitochondrial ribosomal protein L41
BOTL0100004XH06R	0.07494	0.705917	0.61591	0.00251145	0.54097	0.00632536	TRIM13	tripartite motif-containing 13
BOTL0100006XB10R	0.501089	0.00639783	0.271923	0.0735643	-0.229166	0.126276	WAS	Wiskott-Aldrich syndrome-like
BOTL0100006XH11R	-1.25196	0.0103142	0.0422446	0.913577	1.2942	0.00372046	Unknown	unknown
BOTL0100008_B08	0.28047	0.127747	-0.216422	0.181188	-0.496892	0.0053523	Unknown	unknown
BOTL0100008_C07	-0.648591	0.0115022	-0.660559	0.00470209	-0.0119681	0.953519	NOTCH2	Notch homolog 2 (Drosophila)
BOTL0100008_F05	1.30525	0.00188883	0.343636	0.288455	-0.961617	0.00714203	FCGRT	Fc fragment of IgG, receptor, transporter, alpha
BOTL0100010_A04	0.847223	0.0362246	-0.243865	0.469468	-1.09109	0.00426044	AKD2	adenylate kinase domain containing 2
BOTL0100010_B02	0.822885	0.00092042	0.151952	0.413236	-0.670933	0.00183572	BOLA-DMA	major histocompatibility complex, class II, DM alpha-chain,
BOTL0100010_B10	0.459332	0.0551609	-0.163343	0.419527	-0.622675	0.00594384	HERC1	hect (homologous to the E6-AP (UBE3A) carboxyl terminus) domain and RCC1 (CHC1)-like domain (RLD) 1
BOTL0100010_E06	-0.483225	0.0153907	-0.461377	0.0099676	0.0218479	0.89202	RPL23AP12	ribosomal protein L23a pseudogene 12
BOTL0100010_F10	0.375503	0.178775	-0.432445	0.0862482	-0.807948	0.00346906	POLR2G	polymerase (RNA) II (DNA directed) polypeptide G
BOTL0100010_G07	0.970483	0.000950239	0.453173	0.05001	-0.51731	0.0277313	ARF3	ADP-ribosylation factor 3
BOTL0100010_H10	0.689166	0.00394572	-0.128383	0.491403	-0.817549	0.000353177	TMX4	thioredoxin-related transmembrane protein 4 (TMX4)
BOTL0100011_A05	-0.650913	0.00781018	-0.662252	0.00301481	-0.0113389	0.953275	Unknown	unknown
BOTL0100011_G07	-0.467802	0.0759342	-0.729936	0.00407238	-0.262133	0.248148	ARMC3	armadillo repeat containing 3
BOTL0100012_C01	-0.766374	0.00558753	-0.389343	0.0860897	0.377031	0.0955917	LOC100140226	Bos taurus zinc finger protein 701-like (LOC100140226)
BOTL0100012_H08	-0.329487	0.134065	-0.674564	0.00211759	-0.345078	0.0805493	ATP6V0D1	vacuolar proton-ATPase, subunit D; V-ATPase, subunit D
BOTL0100013_B01	-0.467171	0.0262005	0.060653	0.725081	0.527824	0.00651239	AP1S2	adaptor-related protein complex 1, sigma 1 subunit
BOTL0100013_B11	-0.350246	0.0767388	-0.519646	0.0058902	-0.1694	0.317762	DICER1	Dicer1, Dcr-1 homolog (Drosophila)
BOTL0100013_C02	-0.0902687	0.598613	-0.504867	0.00363814	-0.414598	0.0130821	KIAA0240	KIAA0240
BOTL0100013_D01	-0.196631	0.408254	-0.664934	0.00500128	-0.468302	0.0362257	NUP210L	nucleoporin 210kDa
BOTL0100013_E06	-0.340639	0.102028	-0.546393	0.00623778	-0.205754	0.254773	PTPRCAP	protein tyrosine phosphatase, receptor type, C-associated pr...
BOTL0100013_F05	0.188497	0.5467	-0.728768	0.0159961	-0.917265	0.00370332	PKHD1	hypothetical protein LOC787840
BOTL0400024_PCR	-0.374468	0.11166	0.292759	0.157096	0.667226	0.00370122	SAP18	Sin3A-associated protein, 18kDa
BOTL0400029_PCR	-0.338763	0.148954	-0.732268	0.00189254	-0.393505	0.0641597	ATF1	activating transcription factor 1
BOTL0400035_PCR	0.622	0.0257655	0.919966	0.000810528	0.297966	0.203435	PPP2R5B	similar to beta isoform of regulatory subunit B56, protein p...
BOTL0400047_PCR	0.842705	0.0120724	0.816821	0.00693583	-0.0258841	0.923341	MAP3K4	similar to Chk1; checkpoint kinase
BOTL0400072_PCR	0.787506	0.0257742	-0.0426652	0.882757	-0.830171	0.00990436	LOC100133104	hypothetical protein LOC100133104
BOTL0400120_PCR	-0.801115	0.0206606	-0.874597	0.00599267	-0.0734819	0.794405	PTGS2	prostaglandin-endoperoxide synthase 2 (prostaglandin G/H syn...
BOTL0400140_PCR	-0.370766	0.101119	0.337319	0.0931212	0.708085	0.00170301	CCR5	chemokine (C-C motif) receptor 5
BOTL0400190_PCR	-0.205342	0.348479	0.420656	0.0399575	0.625998	0.00420392	DFFA	similar to DNA fragmentation factor alpha subunit
BOTL0400216_PCR	-0.299851	0.132063	-0.559762	0.00404337	-0.259911	0.140244	EFNB1	ephrin-B1
BOTL0400247_PCR	-1.14262	0.00862013	-0.703522	0.0544847	0.439101	0.214143	GFRA2	similar to GDNF family receptor alpha 2 preproprotein
BOTL0400249_PCR	-0.709704	0.0167119	0.322007	0.191207	1.03171	0.000449447	GCGR	similar to glucagon receptor
BOTL0400258_PCR	0.736812	0.110592	1.22974	0.0057113	0.492926	0.220804	FLT3	fms-related tyrosine kinase 3-like
BOTL0400328_PCR	0.404637	0.146386	0.727582	0.00680731	0.322945	0.1883	BCAM	Lutheran blood group (Auberger b antigen included)
BOTL0400403_PCR	0.556248	0.0836964	0.78649	0.0094506	0.230242	0.402286	MDM2	similar to double minute 2 protein
BOTL0400407_PCR	-1.15518	0.00237135	0.134394	0.643972	1.28958	0.000327642	RPL19	similar to ribosomal protein L19
BOTL0400426_PCR	-0.535358	0.0156506	0.198719	0.275301	0.734077	0.000684775	CASP8AP2	caspase 8 associated protein 2
BOTL0400443_PCR	-0.360464	0.0561427	-0.559669	0.00231181	-0.199205	0.217961	CUL1	cullin 1
BOTL0400491_PCR	-0.836908	0.00304788	-0.336089	0.134988	0.50082	0.0320197	GPR98	similar to G protein-coupled receptor 98
BOTL0400511_PCR	0.462714	0.202678	1.01747	0.00445891	0.554753	0.0910975	PRKCI	protein kinase C, iota
BOTL0400543_PCR	0.970777	0.00878981	0.761068	0.0179627	-0.209709	0.479166	PTN	pleiotrophin
BOTL0400560_PCR	0.534656	0.0404713	0.623158	0.00970557	0.0885026	0.683295	RXRB	similar to retinoid X receptor beta
BOTL0400592_PCR	-0.762471	0.0182866	0.0432122	0.869046	0.805683	0.00638803	GZMH	similar to Granzyme H precursor
BOTL0400607_PCR	0.557791	0.144611	-0.522943	0.124242	-1.08073	0.00395414	SPARC	secreted protein, acidic, cysteine-rich
BOTL0400610_PCR	-0.685131	0.0094381	-0.543901	0.0178584	0.141229	0.504047	PCSK6	proprotein convertase subtilisin/kexin type 6
